# Supplementary material for: Air Pollution, Neonatal Immune Responses, and Potential Joint Effects of Maternal Depression
Source: MDPI journal article supplement (doi:10.3390/ijerph18105062), 2021-05-11
Supplement: s1 [file ijerph-969803-supplementary.pdf › ijerph-969803-supplementary.pdf]

# Air Pollution, Neonatal Immune Responses, and Potential Joint Effects of Maternal Depression

Jill Hahn, Diane R. Gold, Brent A. Coull, Marie C. McCormick, Patricia W. Finn, David L. Perkins, Sheryl L. Rifas Shiman, Emily Oken and Laura D. Kubzansky

**Table S1.** Participant characteristics according to whether excluded from (N=1665) or included in the Project Viva study sample (N=463) for each air pollution exposure (%; unless otherwise indicated).

| Characteristic                                       | Traffic Exposures  |                   | PM2.5              |                   | Black Carbon       |                   |
|------------------------------------------------------|--------------------|-------------------|--------------------|-------------------|--------------------|-------------------|
|                                                      | Excluded<br>N=1651 | Included<br>N=461 | Excluded<br>N=1063 | Included<br>N=322 | Excluded<br>N=1625 | Included<br>N=455 |
| <u>Mother</u>                                        |                    |                   |                    |                   |                    |                   |
| Pre-pregnancy BMI, kg/m <sup>2</sup> : Mean $\pm$ SD | 24.9 $\pm$ 5.6     | 24.7 $\pm$ 5.3    | 25.0 $\pm$ 6       | 24.5 $\pm$ 4.8    | 24.9 $\pm$ 5.6     | 24.7 $\pm$ 5.3    |
| Age, year: Mean $\pm$ SD                             | 31.8 $\pm$ 5.3     | 31.9 $\pm$ 5.0    | 31.8 $\pm$ 5.3     | 32.1 $\pm$ 5.0    | 31.8 $\pm$ 5.3     | 31.8 $\pm$ 5.0    |
| Depression score: Mean $\pm$ SD                      | 5.3 $\pm$ 4.7      | 5.3 $\pm$ 5.0     | 5.3 $\pm$ 4.8      | 5.16 $\pm$ 4.57   | 5.3 $\pm$ 4.7      | 5.2 $\pm$ 5.0     |
| Race/ethnicity                                       |                    |                   |                    |                   |                    |                   |
| Black                                                | 17                 | 14                | 17                 | 12                | 17                 | 13                |
| Hispanic                                             | 8                  | 6                 | 8                  | 6                 | 8                  | 6                 |
| White                                                | 65                 | 72                | 65                 | 72                | 65                 | 71                |
| Other                                                | 10                 | 9                 | 10                 | 10                | 10                 | 9                 |
| Education $\leq$ high school                         | 13                 | 10                | 13                 | 11                | 13                 | 10                |
| Household income $\leq$ \$40,000/year                | 17                 | 12                | 16                 | 13                | 16                 | 13                |
| Pregnancy smoking status                             |                    |                   |                    | 0                 |                    | 0                 |
| Never                                                | 68                 | 70                | 68                 | 71                | 68                 | 70                |
| Former                                               | 19                 | 18                | 19                 | 17                | 19                 | 18                |
| Smoked during pregnancy                              | 13                 | 11                | 13                 | 11                | 13                 | 12                |
| Cesarean delivery                                    | 25                 | 19                | 25                 | 18                | 25                 | 19                |
| Score of $>12$ on EPDS                               | 8                  | 11                | 9                  | 9                 | 9                  | 10                |
| Pre-pregnancy depression history                     | 11                 | 12                | 11                 | 14                | 11                 | 12                |
| Antidepressants prescribed during pregnancy          | 3                  | 4                 | 3                  | 4                 | 3                  | 4                 |
| Ever depressed                                       | 20                 | 22                | 20                 | 22                | 20                 | 22                |
| <u>Child</u>                                         |                    |                   |                    |                   |                    |                   |
| Season of birth                                      |                    |                   |                    |                   |                    |                   |
| Winter                                               | 25                 | 24                | 24                 | 28                | 24                 | 25                |
| Spring                                               | 26                 | 26                | 26                 | 26                | 26                 | 26                |
| Summer                                               | 27                 | 27                | 28                 | 24                | 27                 | 27                |
| Fall                                                 | 22                 | 23                | 22                 | 22                | 22                 | 23                |
| Child sex female                                     | 49                 | 45                | 49                 | 45                | 49                 | 45                |

<sup>a</sup>Traffic exposures include proximity to major road and near-residence traffic density.

**Table S2.** Participant characteristics according to depression status in the Project Viva study sample (N=463).

|                                                           | Depression       |                |              |
|-----------------------------------------------------------|------------------|----------------|--------------|
|                                                           | Missing<br>N=102 | Never<br>N=281 | Ever<br>N=80 |
| <b><u>Mother</u></b>                                      |                  |                |              |
| Pre-pregnancy BMI, kg/m <sup>2</sup> ( <i>mean ± SD</i> ) | 26.9 (6.3)       | 23.9 (4.8)     | 24.72 (5.0)  |
| Age, years ( <i>mean ± SD</i> )                           | 29.7 (5.5)       | 32.5 (4.5)     | 31.9 (5.6)   |
| Race/ethnicity                                            |                  |                |              |
| Black                                                     | 30 (29)          | 24 (9)         | 8 (10)       |
| Hispanic/Other                                            | 15 (15)          | 23 (8)         | 10 (12)      |
| White                                                     | 53 (52)          | 220 (78)       | 56 (70)      |
| Education ≤high school                                    | 21 (21)          | 17 (6)         | 8 (10)       |
| Household income ≤\$40,000                                | 17 (17)          | 24 (9)         | 13 (16)      |
| Not married/partnered                                     | 18 (18)          | 10 (4)         | 8 (10)       |
| Hypertensive disorders of pregnancy                       |                  |                |              |
| Gestational hypertension                                  | 6 (6)            | 13 (5)         | 10 (13)      |
| Pre-eclampsia                                             | 5 (5)            | 7 (3)          | 1 (1)        |
| Cesarean delivery                                         | 19 (19)          | 52 (19)        | 16 (20)      |
| Smoking                                                   |                  |                |              |
| Former smoker                                             | 11 (11)          | 57 (20)        | 14 (18)      |
| Smoked during pregnancy                                   | 16 (16)          | 21 (8)         | 17 (21)      |
| <b><u>Child</u></b>                                       |                  |                |              |
| Season of birth                                           |                  |                |              |
| Winter                                                    | 31 (30)          | 56 (20)        | 29 (36)      |
| Spring                                                    | 24 (24)          | 80 (29)        | 14 (18)      |
| Summer                                                    | 21 (21)          | 78 (28)        | 24 (30)      |
| Fall                                                      | 26 (26)          | 67 (24)        | 13 (16)      |
| Child sex female                                          | 37 (36)          | 138 (49)       | 35 (44)      |

**Table S3.** Spearman correlation coefficients (N) for correlations between air pollution measures for Project Viva study sample (N=463).

| Air Pollution Measure | Proximity to Roadway | Traffic Density | PM2.5      |
|-----------------------|----------------------|-----------------|------------|
| Traffic Density       | 0.35 (459)           |                 |            |
| Prenatal PM2.5        | 0.36 (322)           | 0.35 (320)      |            |
| Prenatal Black Carbon | 0.36 (455)           | 0.57 (455)      | 0.40 (318) |

**Table S4.** Interaction term (air pollution x ever depressed) for the joint association of air pollution and mother ever (vs. never) depressed before birth with cytokine concentrations from neonatal cord blood.\*.

|                    |        | PM2.5             | BC                 | Proximity                | Traffic Density   |
|--------------------|--------|-------------------|--------------------|--------------------------|-------------------|
| Cytokine/Stimulant |        | $\beta$ (95% CI)  | $\beta$ (95% CI)   | $\beta$ (95% CI)         | $\beta$ (95% CI)  |
| IL-10              | Medium | 1.01 (0.33, 3.07) | 0.93 (0.08, 11.39) | 0.96 (0.57, 1.61)        | 0.73 (0.47, 1.14) |
|                    | PHA    | 0.59 (0.25, 1.40) | 1.69 (0.17, 16.43) | 0.94 (0.60, 1.49)        | 0.92 (0.62, 1.38) |
|                    | Bla g2 | 0.82 (0.38, 1.80) | 0.64 (0.05, 7.71)  | 0.96 (0.63, 1.45)        | 0.91 (0.64, 1.29) |
|                    | Der f1 | 0.83 (0.37, 1.89) | 0.62 (0.04, 8.87)  | 1.00 (0.65, 1.55)        | 0.90 (0.61, 1.31) |
| TNF                | Medium | 0.64 (0.23, 1.78) | 2.10 (0.20, 21.92) | 1.01 (0.65, 1.56)        | 0.97 (0.63, 1.48) |
|                    | PHA    | 0.88 (0.53, 1.46) | 1.19 (0.32, 4.47)  | 0.86 (0.67, 1.10)        | 1.05 (0.85, 1.31) |
|                    | Bla g2 | 1.00 (0.52, 1.93) | 0.57 (0.07, 4.58)  | <b>0.71 (0.51, 0.99)</b> | 0.96 (0.71, 1.29) |
|                    | Der f1 | 0.87 (0.42, 1.80) | 0.65 (0.05, 7.87)  | 0.66 (0.41, 1.09)        | 0.88 (0.61, 1.26) |
| IL-6               | Medium | 0.91 (0.48, 1.71) | 2.22 (0.48, 10.19) | 0.98 (0.75, 1.29)        | 1.05 (0.82, 1.36) |
|                    | PHA    | 0.86 (0.51, 1.46) | 1.59 (0.46, 5.53)  | 0.92 (0.73, 1.17)        | 1.07 (0.86, 1.33) |
|                    | Bla g2 | 1.05 (0.70, 1.59) | 0.55 (0.15, 2.05)  | 0.87 (0.70, 1.07)        | 0.91 (0.75, 1.09) |
|                    | Der f1 | 0.96 (0.63, 1.47) | 0.61 (0.15, 2.55)  | <b>0.83 (0.66, 1.03)</b> | 0.95 (0.78, 1.16) |

Note: Models were adjusted for maternal age (continuous), race/ethnicity, education ( $\leq$ high school), household income ( $\leq$ \$40,000/year), child sex, season of birth (date, sine, and cosine of birthdate), pre-pregnancy BMI (continuous), and smoking (never, former, during pregnancy). Models using values from IL-10 in Medium were analyzed using Tobit regression, to account for proportion of samples below level of detection of assay. All other models were analyzed using linear regression. \*  $\beta$  represents the ratio of geometric mean for one-unit increase in air pollution. Thus the estimate is considered statistically non-significant if the confidence interval includes 1. Bold text:  $p < 0.10$ .

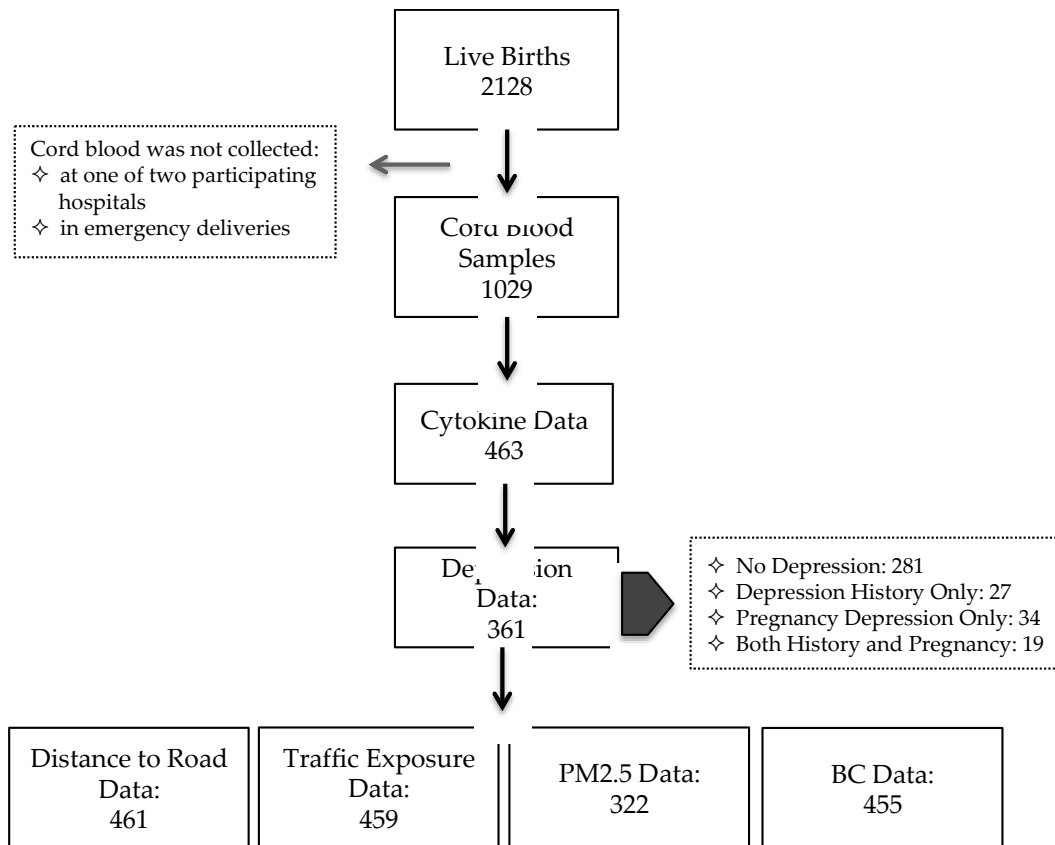

**Figure S1.** Flow chart of sample sizes for those included in the study. Note: missing depression and covariate data were imputed, using multiple imputation, for purposes of analyses. Missing air pollution data were not imputed.

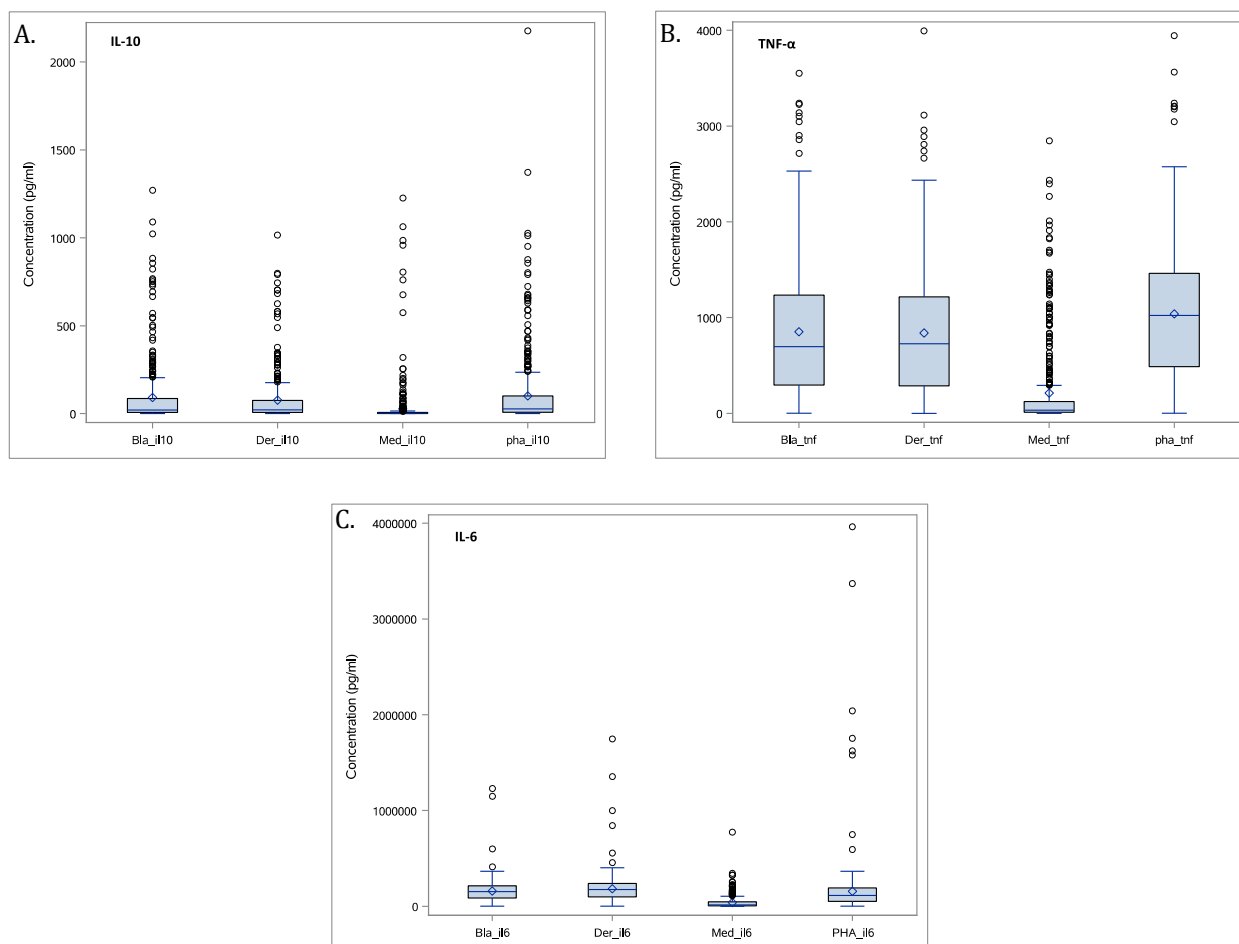

**Figure S2.** Boxplots: production of cytokines in cord blood mononuclear cells collected at delivery from Project Viva study participants (N=463), unstimulated (Med), and after stimulation with mitogen (PHA) and allergen (Bla g2, Der f1). **(A)** Interleukin-10 (IL-10), **(B)** Tumor necrosis factor  $\alpha$  (TNF- $\alpha$ ), **(C)** IL-6.

A.

B.

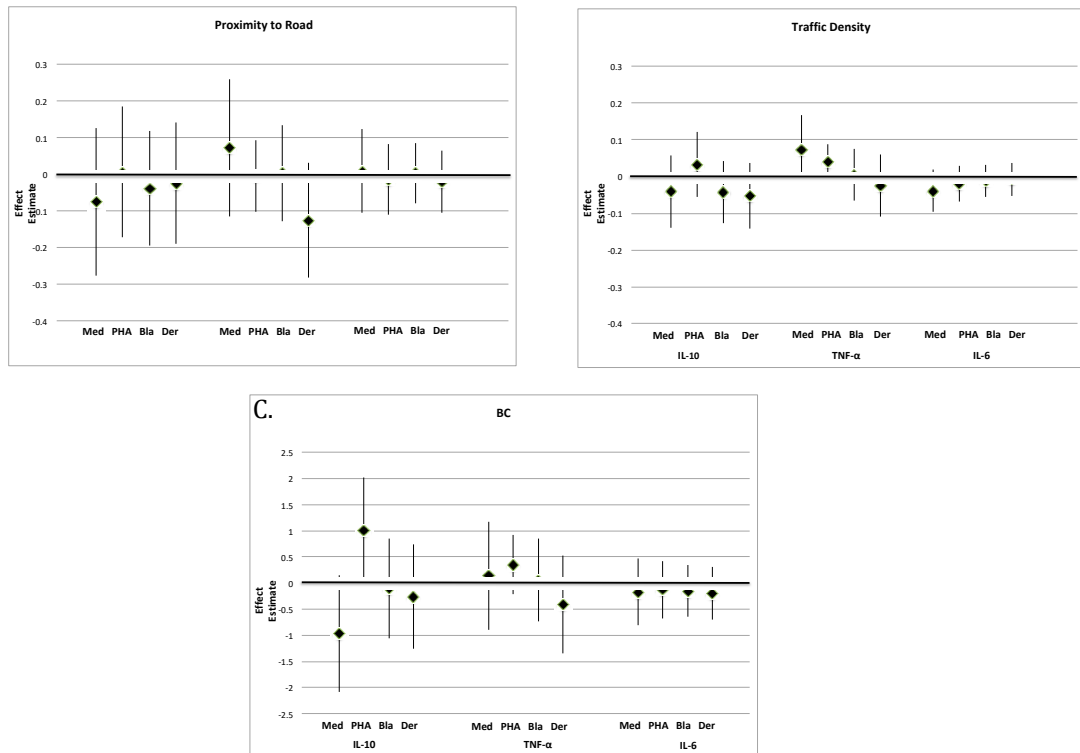

**Figure S3.** Effect estimates for the difference in cord blood cytokine concentrations with differences in proximity to road, traffic exposure, or black carbon during pregnancy. Cytokines: IL-10, TNF- $\alpha$ , and IL6 (pg/ml). Med: unstimulated lymphocytes. PHA: phytohemagglutinin; Bla: cockroach antigen; Der: dust mite antigen. Unstimulated (Med) IL-10 was analyzed using Tobit regression; others were analyzed using linear regression. Models adjusted for maternal age, race/ethnicity, education, household income, child sex, season of birth, pre-pregnancy BMI, and smoking.

### Temporally resolved BC and PM2.5 measures

Ambient concentrations of PM2.5 and BC were measured hourly at a central monitoring site (Harvard Supersite) in Boston. PM2.5 concentrations were measured with a tapered element oscillation microbalance (model 1400A; Rupprecht and Pastashnick, East Greenbush, NY), and BC concentrations were measured using an aethalometer (model AE-16; Magee Scientific Co., Berkeley, CA)(Kang et al. 2010). Missing hourly data for PM2.5 and BC were imputed, using long-term trend; season (1 = May–September, 0 = otherwise); seasonality (sine and cosine terms); hour of the day; day of the week; weather (barometric pressure, relative humidity, mean temperature, horizontal visibility, wind direction, and wind speed); and interactions with season, wind, and hour of the day. In total, 2% of the 24-hr PM2.5 and BC estimates were imputed.

Time windows of exposure (“moving averages”) of 2, 7, and 14 days before birth were calculated to evaluate air pollution exposures close to the time of birth. For each central-site exposure period of interest, for each participant, we required that participants live within 40 km of the Harvard Supersite and that exposure data be available for at least 75% of the time in the specific averaging period; otherwise, the exposure was set to missing.

### Statistical Analysis

#### *Additional Analyses*

We ran models of the same form as described above using 7-day, and 14-day before birth moving averages of spatio-temporally resolved estimates of BC and PM2.5, to assess possible short-term effects of maternal air pollution exposure on neonatal immune responses. In addition, we ran models of temporally resolved BC and PM2.5 exposure, to determine whether the modeled exposures gave results comparable to the spatio-temporally resolved exposures.

### Results

We compared temporal-spatially modeled values for 2 day, 7 day, and 14 day exposure windows before birth, for both BC and PM2.5, with temporally measured values for the same exposure windows. We found, for each pollutant, that effect estimates for the modeled versus the temporally resolved values for each pollutant showed similar patterns. Most of the effect estimates were close to 0 and statistically insignificant. The only exception was the association of BC with unstimulated TNF- $\alpha$  (incubated in medium only), which was positive and statistically significant for both the spatio-temporally resolved ( $\beta=1.14$ ; CI 0.25-2.03) and the temporally resolved models ( $\beta=1.42$ ; CI 0.27-2.58).
